# Supplementary material for: Quantitative evaluation of an information leaflet to increase prompt help-seeking for gynaecological cancer symptoms
Source: Springer Nature journal article supplement (doi:10.1186/s12889-016-3032-y), 2016-05-03
Supplement: MOESM1 [file 12889_2016_3032_MOESM1_ESM.pdf]

# Do you have any of these symptoms?

If the answer is **yes** to even **one** of these symptoms, it is important to make an appointment with your GP **today**.

**It might help you to fill out this checklist and bring it to your appointment.** This will make it easier to give your GP as much detail as possible on your symptoms.

| Symptom                                                             | Tick if you have symptom | When did it start? |
|---------------------------------------------------------------------|--------------------------|--------------------|
| Abdominal or pelvic pain                                            |                          |                    |
| Bleeding between periods, after sex or after the menopause          |                          |                    |
| Vaginal discharge that is smelly or blood stained                   |                          |                    |
| Longer or heavier periods                                           |                          |                    |
| Bloating, gas or constipation that doesn't go away                  |                          |                    |
| Pain during sex                                                     |                          |                    |
| Lower back pain that doesn't go away                                |                          |                    |
| Pain, lump, ulcer, soreness or persistent itching of the vulva      |                          |                    |
| Needing to go to the toilet more urgently or frequently than normal |                          |                    |
| Feeling full quickly or loss of appetite                            |                          |                    |

## Make a promise to yourself:

If I have **any** of these symptoms I will make an appointment with my GP **today**.

Call our surgery on: **0207 xxx xxxx**

Today's date \_\_\_\_\_

Date and time of your appointment \_\_\_\_\_

# Common concerns

- Even if you don't feel ill, you should have your symptoms checked.
- These symptoms can seem mild and unimportant, but if you have any of these symptoms, it is important that you see your GP.
- You might think that your symptoms will just clear up on their own but it is **better to see your GP**.
- Even if you have been to your pharmacist or GP already, **you should visit them again if your symptoms haven't gone away**.

**It is likely that these symptoms are not due to cancer, but it is important to have them checked.**

You can find more information about gynaecological cancers at:

**[www.cancerhelp.org.uk](http://www.cancerhelp.org.uk)**

Or by calling **0808 800 4040** (Mon-Fri 9am-5pm) to speak to a Cancer Research UK nurse

LOGO HERE

A MESSAGE FROM YOUR GP

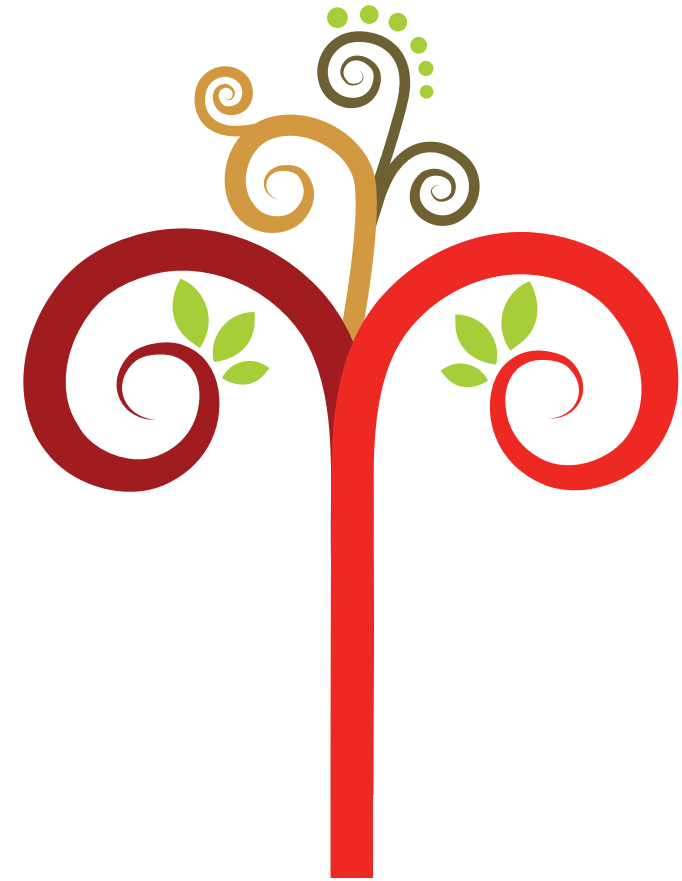

# GYNAECOLOGICAL CANCERS

## *know the signs*

### Information for Women

Dear Patient,

*I'm sending this leaflet to all women in my practice because I think that it is important that everyone knows about the symptoms of gynaecological cancers.*

*Every year around 18,000 women of all ages in the UK are diagnosed with a gynaecological cancer.*

*I want you to feel able to come to see me if you notice anything that is **not normal for you.***

*In this leaflet you will find a **symptom checklist** that will help you to see if you need to make an appointment.*

*If you are experiencing **any** of these symptoms please don't delay. **Come to see me.***

*If you are worried about gynaecological cancer, please speak up. **You will not be wasting my time.***

*Yours sincerely,*

(GP's signature)

Dr. XXXXXXXXXXXXX

## What are gynaecological cancers?

**A gynaecological cancer is a cancer that occurs in your reproductive system:**

- Uterus (womb) including endometrium (lining of womb)
- Cervix (neck of womb)
- Ovaries
- Vagina
- Vulva (outside part of the vagina)

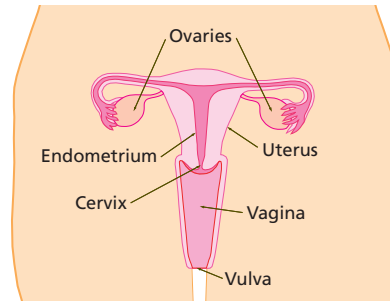

### Early signs of gynaecological cancers

**The most common symptoms of gynaecological cancers are:**

- Abdominal or pelvic pain
- Bleeding between periods, after sex or after the menopause
- Vaginal discharge that is smelly or bloodstained
- Longer or heavier periods
- Bloating, gas or constipation that doesn't go away
- Pain during sex
- Lower back pain that doesn't go away
- Pain, lump, ulcer, soreness or persistent itching of the vulva
- Needing to go to the toilet more urgently and frequently than normal
- Feeling full quickly or loss of appetite

**These are important if they are new for you or if they don't go away.**

## If you are embarrassed or worried...

- You can ask to see a female doctor or ask to have a female member of staff accompany you to your appointment.
- Remember, your GP is used to dealing with sensitive issues and can support you.
- It can help to discuss your concerns with someone you trust among your friends or family.
- You can discuss with your GP any tests that may be offered to you before you choose whether to have them.

**The earlier cancer is diagnosed, the better the chances of survival.**

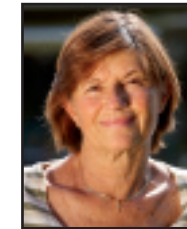

**“Cervical cancer never crossed my mind. I was really fit and healthy. I thought people like me didn't get cancer.”**

**Sandra, 64**, cervical cancer survivor

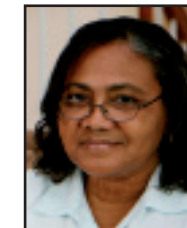

**“I thought a normal smear test meant that I was ok. I didn't realise that you could get cancer in other parts.”**

**Meera, 51**, ovarian cancer survivor
